# Supplementary material for: Low-driving-voltage sky-blue phosphorescent organic light-emitting diodes with bicarbazole-bipyridine bipolar host materials
Source: Royal Society of Chemistry journal article supplement (doi:10.1039/d1qm00018g), 2021-01-01
Supplement: d1qm00018g1.pdf [file d1qm00018g1.pdf]

## **Supporting Information**

**For**

# **Low-Driving-Voltage Sky-Blue Phosphorescent Organic Light-Emitting Diodes with Bicarbazole-bipyridine Bipolar Host Materials**

Deli Li, Di Liu,\* Jiuyan Li,\* Ruizhi Dong, Botao Liu, Qinhe Wei

State Key Laboratory of Fine Chemicals, College of Chemical Engineering, Dalian

University of Technology, 2 Linggong Road, Dalian, 116024, China.

E-mail: liudi@dlut.edu.cn, jiuyanli@dlut.edu.cn

## Supplementary Figures and Tables

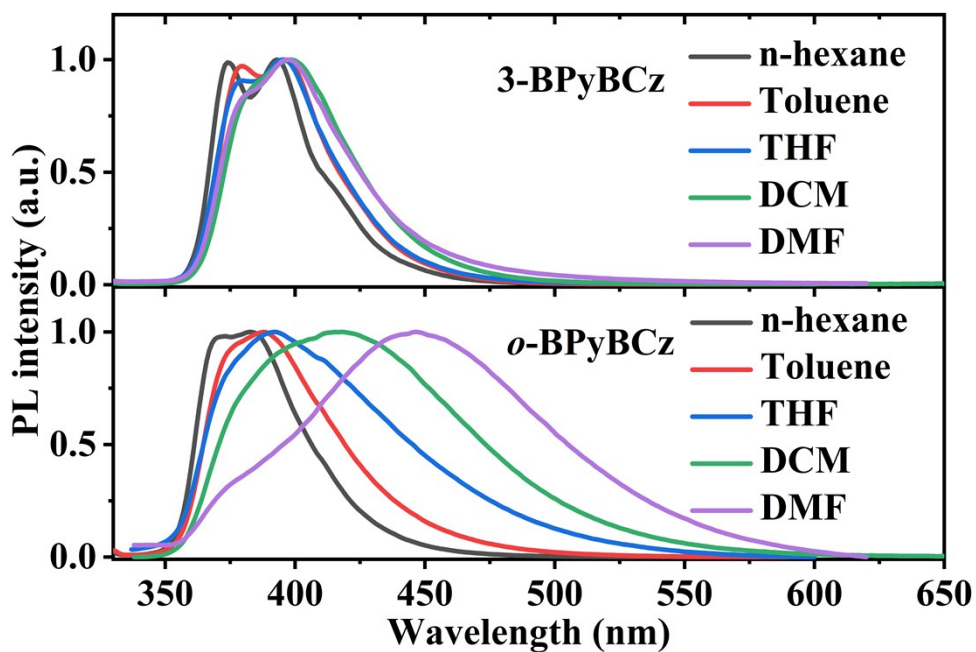

Fig. S1. PL spectra of 3-BPyBCz and *o*-BPyBCz in various solvents with different polarity.

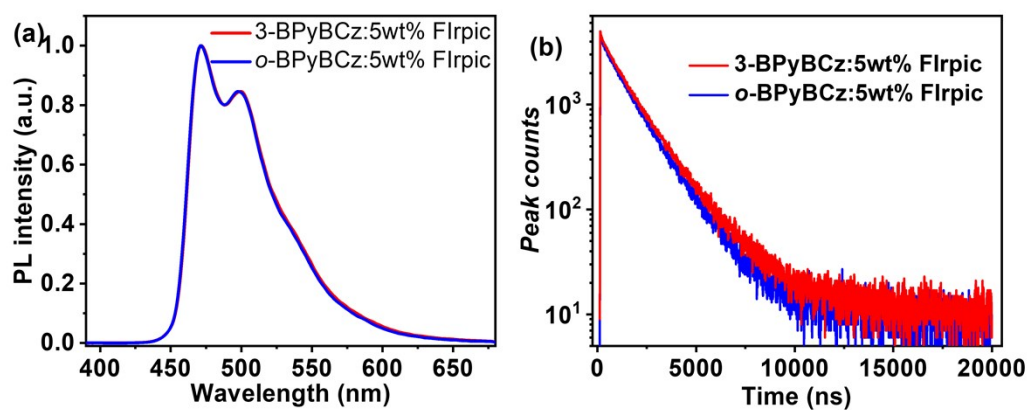

Fig. S2. The PL spectra (a) and transient PL decay (b) of FIrpic doped in 3-BPyBCz and *o*-BPyBCz films.

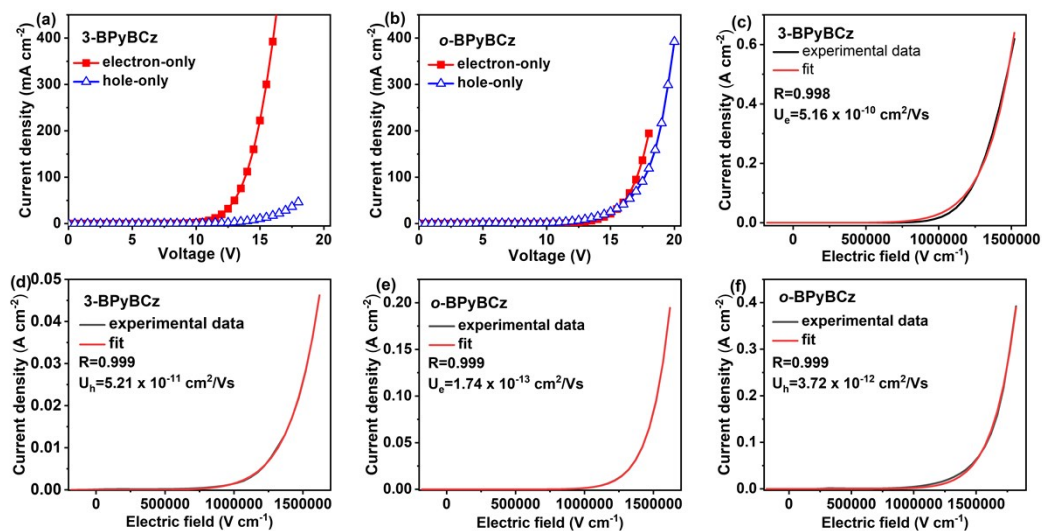

**Fig. S3.** The  $J$ - $V$  (a and b) and  $J$ - $E$  (c-f) curves for the ohmic contact single-carrier devices of 3-BPyBCz and *o*-BPyBCz.

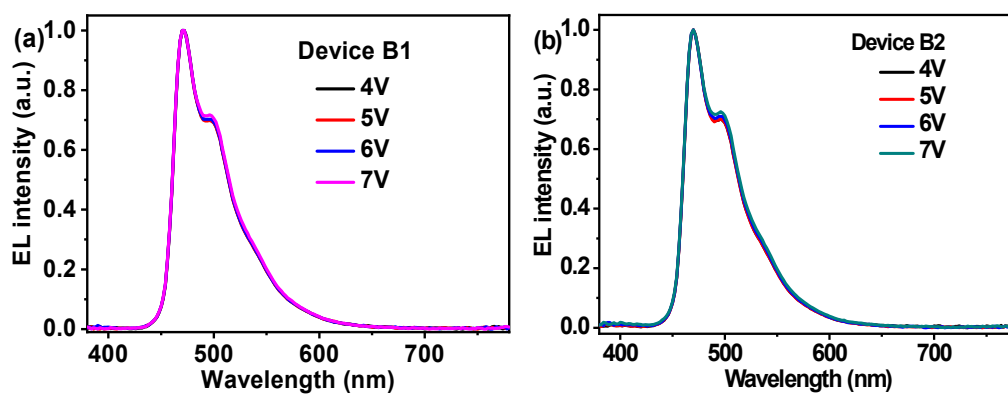

**Fig. S4.** EL spectra of 3-BPyBCz and *o*-BPyBCz based device B1 and B2 at different voltages.

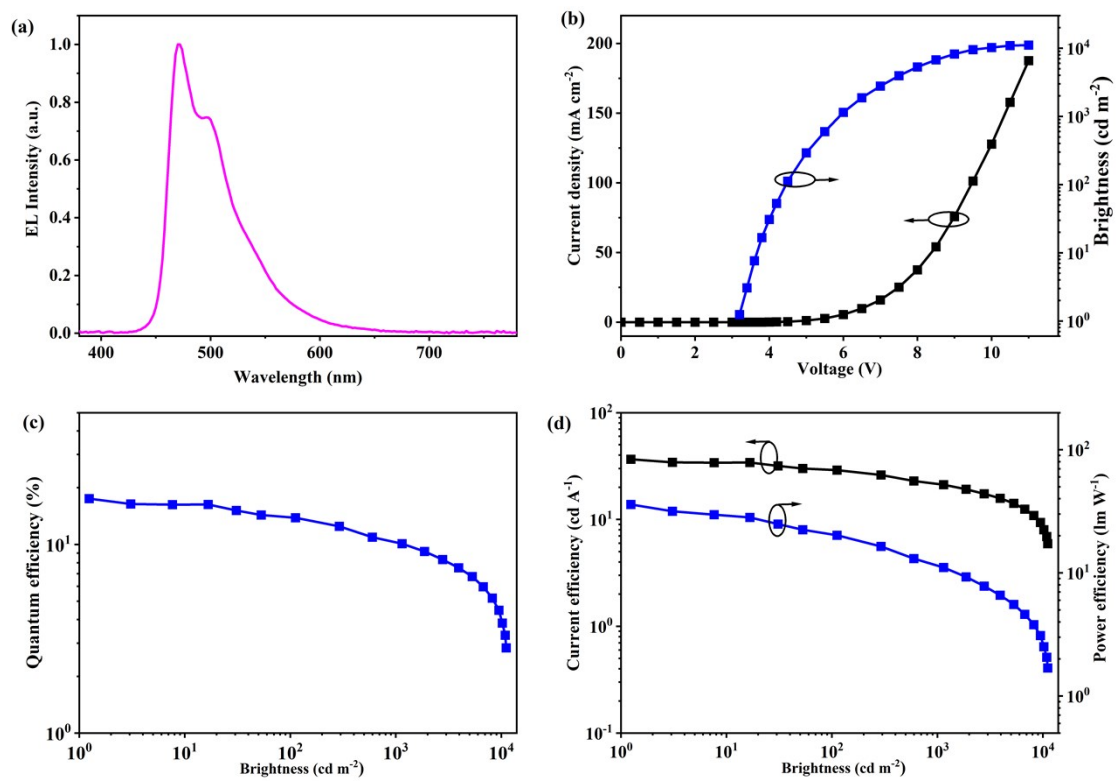

**Fig. S5.** The EL spectra (a),  $J$ - $V$ - $B$  characteristics (b) and efficiency curves (c and d)

for mCP hosted sky-blue PhOLED B3.

**Table S1** Comparison of the turn-on voltages of FIrpic based PhOLEDs reported both in present work and in literatures.

| Host                           | $V_{on}$<br>[V] | $V_{100}$<br>[V] | $V_{1000}$ [V] | Reference                                    |
|--------------------------------|-----------------|------------------|----------------|----------------------------------------------|
| <b>3-BPyBCz</b>                | <b>2.3</b>      | <b>3.17</b>      | <b>4.14</b>    | <b>This work</b>                             |
| <b>o-BPyBCz</b>                | <b>2.4</b>      | <b>3.32</b>      | <b>4.06</b>    |                                              |
| <i>p</i> -BPyCz                | 2.8             |                  |                | ACS Appl. Mater. Interfaces, 2017, 9, 37888  |
| <i>p</i> -BPyDCz               | 2.6             |                  |                | Adv. Funct. Mater. 2018, 28, 1803193         |
| PyTzDCz                        | 2.7             |                  |                | J. Mater. Chem. C, 2018, 6, 7839             |
| PyTzSCz                        | 2.6             |                  |                |                                              |
| BPCN-Cz2Ph                     |                 | 3.60             |                | Org. Electron., 2020, 81, 105660             |
| BPCN-2Cz                       |                 | 3.36             |                |                                              |
| BPCN-3Cz                       |                 | 3.17             |                |                                              |
| mCPCN                          | ~2.5            | 4                |                | J. Mater. Chem., 2012, 22, 16114             |
| SF33                           | 2.8             |                  | 5.1            | Adv. Mater., 2015, 27, 4213                  |
| SF34                           | 3.0             |                  | 4.6            |                                              |
| DCzPBI                         | 2.8             |                  |                | Org. Electron., 2020, 77, 105513             |
| POCzPBI                        | 2.9             |                  |                |                                              |
| DPOPBI                         | 2.7             |                  |                |                                              |
| DPBP-DMAC                      | 2.7             |                  |                | ACS Appl. Mater. Interfaces, 2019, 11, 27134 |
| TCZSO <sub>2</sub>             |                 | 3.6              |                | J. Mater. Chem. C, 2019, 7, 6714             |
| p2PCB2CZ                       | 2.8             |                  |                | ACS Appl. Mater. Interfaces, 2019, 11, 6292  |
| SAIP                           | 2.6             |                  |                | J. Mater. Chem. C, 2019, 7, 1370             |
| mCP: PO-T2T<br>(exciplex host) | 2.4             | 2.75             | 3.29           | Adv. Funct. Mater., 2015, 25, 361-366        |
